# Supplementary material for: Cisplatin in combination with Phenethyl Isothiocyanate (PEITC), a potential new therapeutic strategy for malignant pleural mesothelioma
Source: PubMed Central journal article supplement (PMC4294387; doi:10.18632/oncotarget.2604), 2014-10-18
Supplement: oncotarget-05-11641-s001.pdf [file oncotarget-05-11641-s001.pdf]

# Cisplatin in combination with Phenethyl Isothiocyanate (PEITC), a potential new therapeutic strategy for malignant pleural mesothelioma

## Supplementary Material

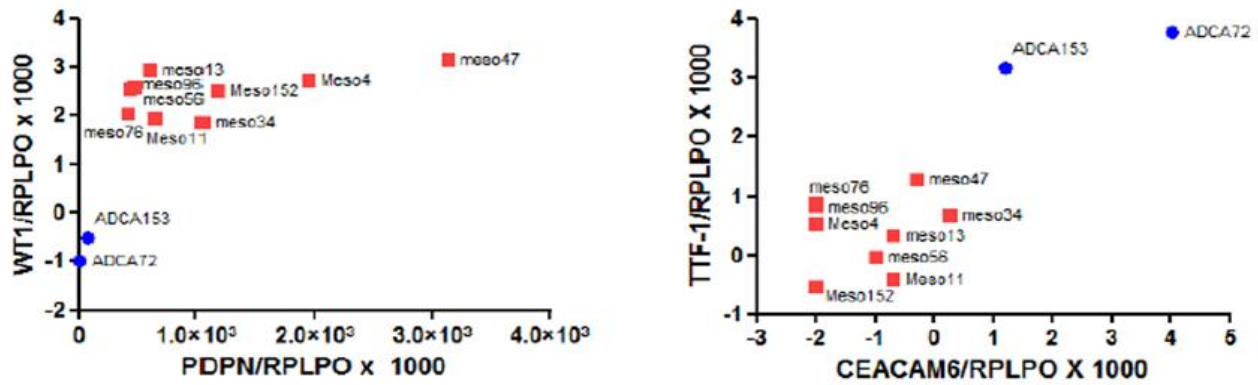

**Figure S1 : Characterisation of MPM and lung ADCA cell lines established from patients' pleural effusion.** Expression of mRNA of usual immunohistochemical markers used to diagnose MPM were measured using real-time PCR. A, mRNA expression of MPM markers Wilm's Tumor antigen (WT1) and podoplanin (PDPN). B, mRNA expression of lung ADCA markers Thyroid transcription factor-1 (TTF-1) and Carcinoembryonic antigen-related cell adhesion molecule-6 (CEACAM6).

A

Meso 11

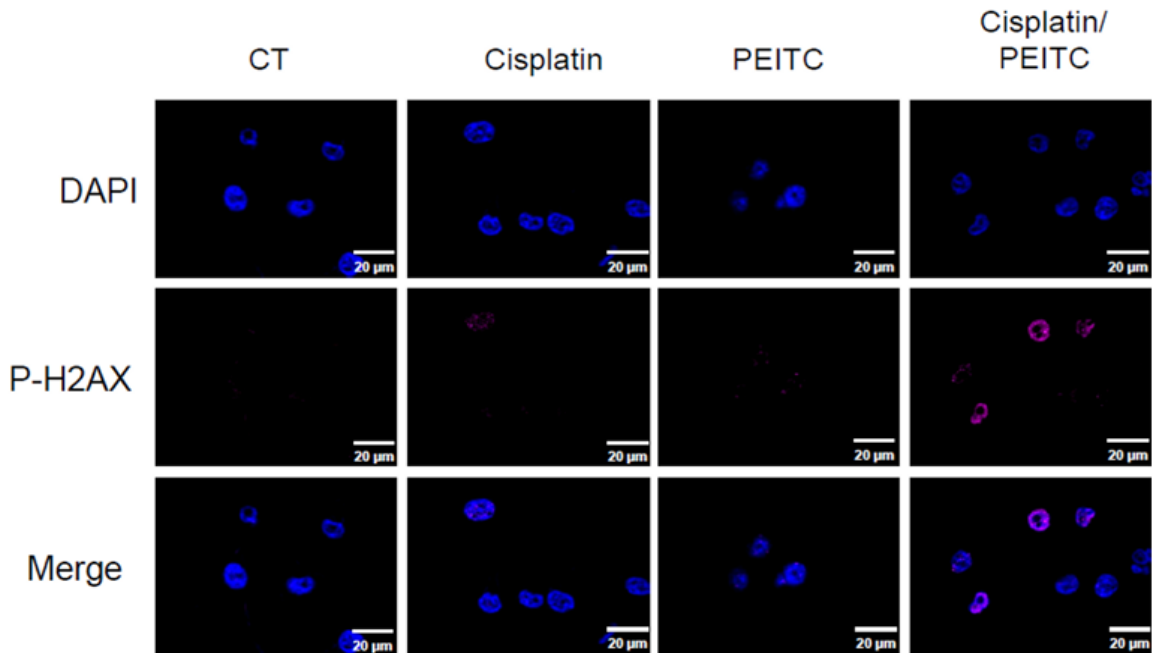

B

Meso 4

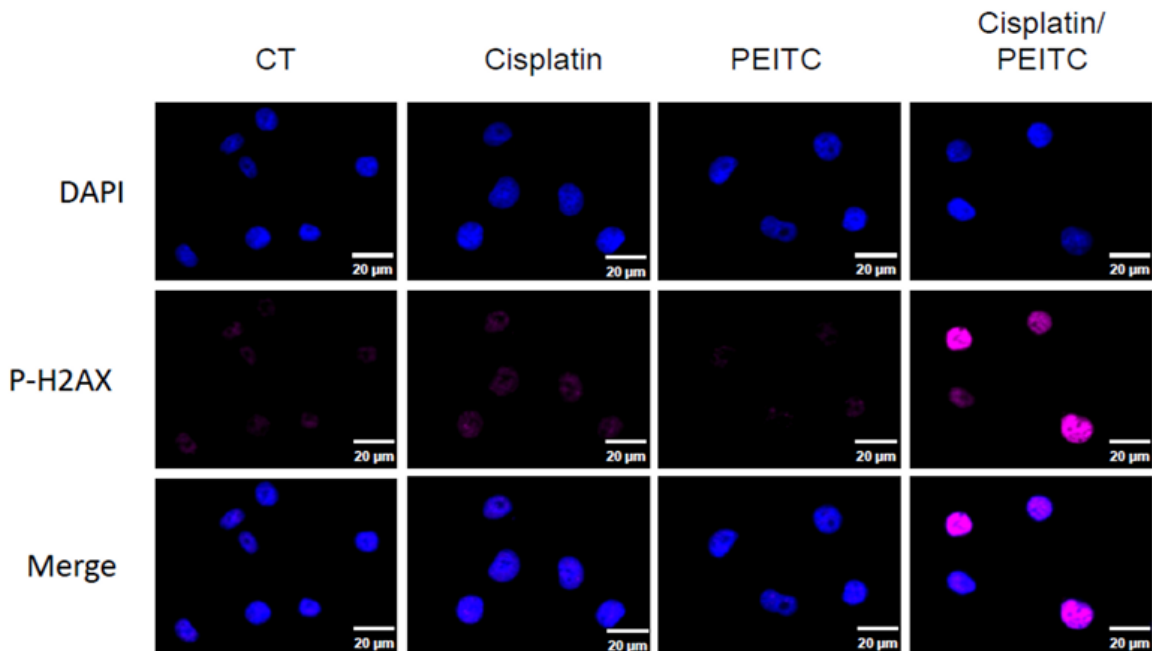

**Figure S2: Effect of PEITC and Cisplatin alone or in combination on the DNA recruitment of the phosphorylated form of histone H2A.X in MPM cells.**

Cells were treated with cisplatin (0.8mg/l) and PEITC (4 $\mu$ M) alone or in combination for 24h prior to PAF 4% fixation and immunofluorescence staining for P-H2AX. Representative images of MPM cells (Meso11 and Meso4) stained for P-H2A.X (pink), stained with DAPI (Blue) for nuclei labeling and merge pictures.

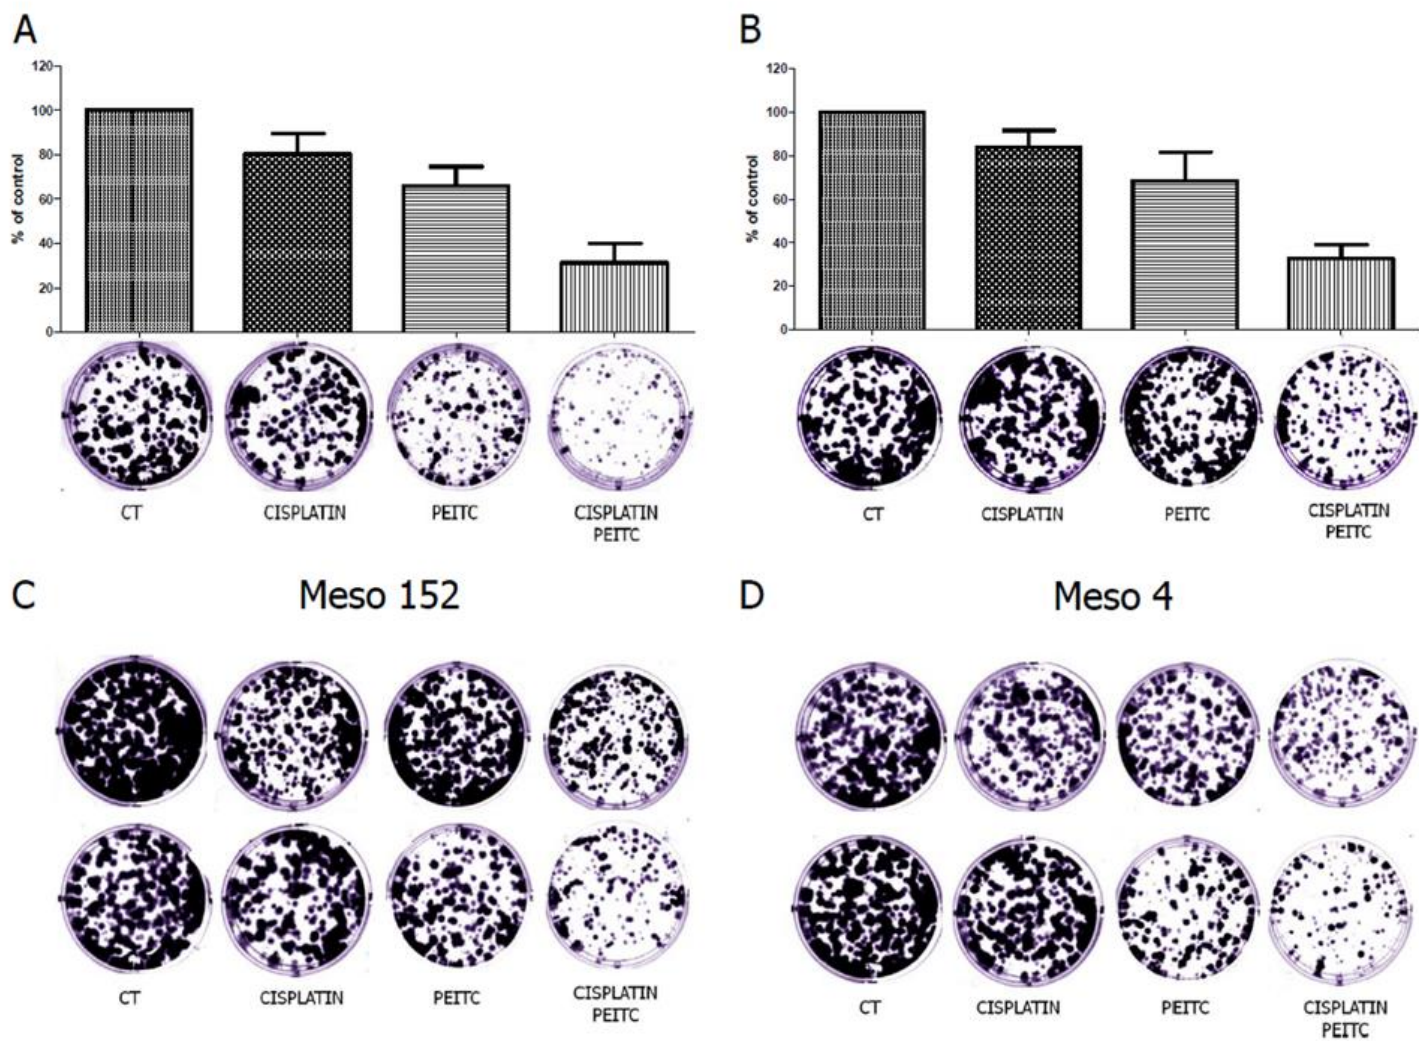

**Figure S3: Effect of PEITC and cisplatin alone or in combination on MPM cells clonogenic properties.**

MPM cells were treated with cisplatin (0.05mg/l) and PEITC (2 $\mu$ M) alone or in combination for 10 days. At day 10, cells were fixed and stained with Crystal Violet. Cell wells were imaged and coloration quantified. A and B show the values of the mean  $\pm$  SEM of coloration quantification of three independent experiments for both cell lines. C and D show the images obtained for both cell lines in the two other independent experiments.

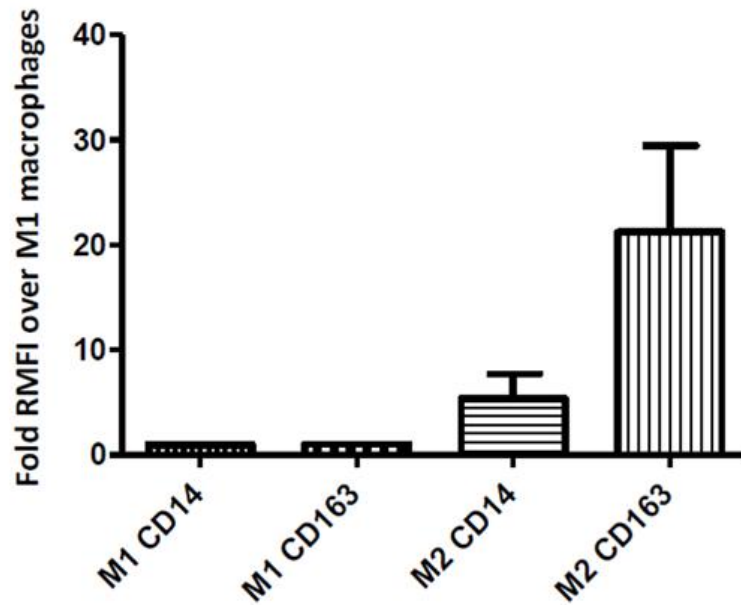

**Figure S4: Characterization of M2 macrophages.**

M2 macrophages were obtained from monocytes that were differentiated with a treatment with M-CSF (50ng/ml). As a control, a fraction of monocytes were also treated with GM-CSF (20ng/ml) to obtain M1 macrophages. After 5 days, both M-CSF and GM-CSF treated monocytes were harvested and characterized by flow cytometry using CD14-FITC and CD163-APC staining. Values represent the mean  $\pm$  SEM of three independent monocytes' differentiation experiments.
